# Supplementary material for: Suicidal thoughts (ideation) among elite athletics (track and field) athletes: associations with sports participation, psychological resourcefulness and having been a victim of sexual and/or physical abuse
Source: PubMed Central journal article supplement — Br J Sports Med. 2020 Feb 26;55(4):198–205. doi: 10.1136/bjsports-2019-101386 (PMC7873412; doi:10.1136/bjsports-2019-101386), 2020-02-26
Supplement: bjsports-2019-101386supp001.pdf [file bjsports-2019-101386supp001.pdf]

**Online Table 1** Correlations (Pearson's *r*) between SoC-13 scores and Brief Cope component scores (n=192).

|               | BRIEF COPE COMPONENTS   |                                   |                           |                               |                         |
|---------------|-------------------------|-----------------------------------|---------------------------|-------------------------------|-------------------------|
|               | Self-Blame              | Exploiting support to take action | Behavioural disengagement | Humour and positive reframing | Turning to religion     |
| <b>SOC-13</b> |                         |                                   |                           |                               |                         |
| Males         | $r=-0.18$ ( $P=0.107$ ) | $r=0.20$ ( $P=0.066$ )            | $r=-0.44$ ( $P<0.001$ )   | $r=0.18$ ( $P=0.107$ )        | $r=0.08$ ( $P=0.485$ )  |
| Females       | $r=-0.36$ ( $P<0.001$ ) | $r=0.14$ ( $P=0.168$ )            | $r=-0.52$ ( $P<0.001$ )   | $r=-0.07$ ( $P=0.479$ )       | $r=-0.03$ ( $P=0.769$ ) |
| Total         | $r=-0.29$ ( $P<0.001$ ) | $r=0.15$ ( $P=0.038$ )            | $r=-0.50$ ( $P<0.001$ )   | $r=0.04$ ( $P=0.605$ )        | $r=0.02$ ( $P=0.815$ )  |
